# The Emerging Genomic Landscape of Endometrial Cancer

Matthieu Le Gallo<sup>1</sup> and Daphne W. Bell<sup>1\*</sup>

**BACKGROUND:** Endometrial cancer is responsible for approximately 74 000 deaths annually among women worldwide. It is a heterogeneous disease comprising multiple histologic subtypes. In the US, the majority of deaths from endometrial carcinoma are attributed to the serous and endometrioid subtypes. An understanding of the fundamental genomic alterations that drive serous and endometrioid endometrial carcinomas lays the foundation for the identification of molecular markers that could improve the clinical management of patients presenting with these tumors.

**CONTENT:** We review the current state of knowledge regarding somatic genomic alterations that occur in serous and endometrioid endometrial tumors. We present this knowledge in a historical context by reviewing the genomic alterations that studies of individual genes and proteins have identified over the past 2 decades or so. We then review very recent comprehensive and systematic surveys of genomic, exomic, transcriptomic, epigenomic, and proteomic alterations in serous and endometrioid endometrial carcinomas.

**SUMMARY:** The recent mapping of the genomic landscape of serous and endometrioid endometrial carcinomas has produced the first comprehensive molecular classification of these tumors, which has distinguished 4 molecular subgroups: a *POLE* [polymerase (DNA directed),  $\epsilon$ , catalytic subunit] ultramutated subgroup, a hypermutated/microsatellite-unstable subgroup, a copy number–low/microsatellite-stable subgroup, and a copy number–high subgroup. This molecular classification may ultimately serve to refine the diagnosis and treatment of women with endometrioid and serous endometrial tumors.

© 2013 American Association for Clinical Chemistry

Cancers that arise in the body (corpus) of the uterus represent the eighth leading cause of cancer-related death among American women, accounting for an estimated 8190 deaths in 2013 (1). Worldwide, uterine

corpus cancers caused approximately 74 000 deaths in 2008 (2). The majority of uterine corpus cancers are endometrial carcinomas, with the remaining cases (3%–5%) being sarcomas (stromal sarcomas, leiomyosarcomas, undifferentiated sarcomas, adenosarcomas) (3). Endometrial carcinomas can be further classified by histology as endometrioid adenocarcinoma, serous adenocarcinoma, clear cell adenocarcinoma, mixed cell carcinoma, mucinous adenocarcinoma, metastatic carcinoma (carcinosarcoma), squamous cell carcinoma, transitional cell carcinoma, small cell carcinoma, undifferentiated carcinoma, and others (4). The classification of endometrial carcinomas by histologic subtype, clinical stage, and grade is important in assessing prognosis and in deciding the most appropriate treatment regimen [reviewed in (5)].

In the US, the survival rates for uterine corpus cancer show substantial racial disparity, with 5-year relative survival rates of only 57%–63% for African American women, compared with 84%–88% for white women (1). This difference in survival is explained at least in part by differences in socioeconomic status, access to healthcare, and the fact that compared with white women, African American women are more likely to be diagnosed with aggressive histologic subtypes, including serous carcinomas, clear cell carcinomas, and sarcomas [reviewed in (6)].

The majority of endometrial carcinomas arise sporadically via acquired somatic alterations. A large population-based, case control, genome-wide association study has recently identified a locus (rs1202524) on 1q42.2—in the vicinity of the *CAPN9*<sup>2</sup> (calpain 9)

<sup>2</sup> Human genes: *CAPN9*, calpain 9; *MLH1*, mutL homolog 1; *MSH2*, mutS homolog 2; *MSH6*, mutS homolog 6; *PMS2*, PMS2 postmeiotic segregation increased 2 (*S. cerevisiae*); *EPCAM*, epithelial cell adhesion molecule; *PTEN*, phosphatase and tensin homolog; *POLD1*, polymerase (DNA directed), delta 1, catalytic subunit; *BRCA1*, breast cancer 1, early onset; *BRCA2*, breast cancer 2, early onset; *PIK3CA*, phosphatidylinositol-4,5-bisphosphate 3-kinase, catalytic subunit alpha; *PIK3R1*, phosphoinositide-3-kinase, regulatory subunit 1 (alpha); *ARID1A*, AT rich interactive domain 1A (SWI-like); *KRAS*, Kirsten rat sarcoma viral oncogene homolog; *RASSF1*, Ras association (RalGDS/AF-6) domain family member 1; alias, RASSF1A; *FGFR2*, fibroblast growth factor receptor 2; *CTNNB1*, catenin (cadherin-associated protein), beta 1, 88kDa; *TP53*, tumor protein p53; *ERBB2*, v-erb-b2 avian erythroblastic leukemia viral oncogene homolog 2; *PPP2R1A*, protein phosphatase 2, regulatory subunit A, alpha; *POLE*, polymerase (DNA directed), epsilon, catalytic subunit; *ARID5B*, AT rich interactive domain 5B (MRF1-like); *CSDE1*, cold shock domain containing E1, RNA-binding; *CTCF*, CCCTC-binding factor (zinc finger protein); *GIGYF2*, GRB10 interacting GYF protein 2; *HIST1H2BD*, histone cluster 1, H2bd; *LIMCH1*, LIM and calponin homology domains 1; *MIR1277*, microRNA 1277; *NKAP*, NFkB activating

<sup>1</sup> Cancer Genetics Branch, National Human Genome Research Institute, National Institutes of Health, Bethesda, MD.

\* Address correspondence to this author at: National Human Genome Research Institute, Cancer Genetics Branch, 50 South Dr., MSC-8000, Bethesda, MD 20892. Fax 301-594-1360; e-mail bell@daph@mail.nih.gov.

Received July 15, 2013; accepted October 10, 2013.

Previously published online at DOI: 10.1373/clinchem.2013.205740

gene—that may be associated with an increased risk of endometrial cancer (7).

A small fraction of endometrial cancers are associated with an autosomal dominant inherited genetic susceptibility in the context of Lynch syndrome (hereditary nonpolyposis colorectal cancer) and Cowden syndrome (8–10). Lynch syndrome is attributed to germline mutations in mismatch-repair genes—*MLH1* (mutL homolog 1), *MSH2* (mutS homolog 2), *MSH6* (mutS homolog 6), *PMS2* [*PMS2* postmeiotic segregation increased 2 (*S. cerevisiae*)]—as well as germline deletions of *EPCAM* (epithelial cell adhesion molecule) that produce transcriptional read-through leading to hypermethylation of the *MSH2* promoter, which is located adjacent to *EPCAM* on chromosome 2p21. In contrast, Cowden syndrome is linked to germline mutations in the *PTEN*<sup>3</sup> tumor suppressor gene. A single-institution study found that the relative frequency of endometrioid and nonendometrioid carcinomas in endometrial cancer patients with Lynch syndrome was similar to their relative frequency in the general population (11). Recently, whole-genome sequencing of constitutional DNA from individuals diagnosed with multiple colorectal adenomas by age 60 years revealed that a germline mutation (Ser478Asn) in the *POLD1* [polymerase (DNA directed), delta 1, catalytic subunit] gene, which encodes the catalytic subunit of polymerase  $\delta$  that promotes lagging-strand synthesis during DNA replication, is linked to an inherited predisposi-

tion to both colorectal cancer and endometrial cancer (12). Several studies have suggested that serous endometrial carcinoma may be a component tumor of hereditary breast ovarian cancer syndrome [reviewed in (13)]. Strong epidemiologic evidence has shown that the increased incidence of serous endometrial carcinoma in carriers of *BRCA1* (breast cancer 1, early onset) or *BRCA2* (breast cancer 2, early onset) mutations is associated with prior tamoxifen treatment, rather than with an underlying genetic susceptibility (14). In this regard, it will be important to also ascertain whether tamoxifen use accounts for any of the documented increased risk for endometrial cancer associated with Cowden syndrome, which also includes breast cancer as a clinical manifestation.

A detailed discussion of the germline genomic alterations that confer susceptibility to endometrial cancer is the subject of another article in this special issue. In the present article, we review both the traditional histologic classification of endometrioid and serous endometrial carcinomas and the molecular classification of these tumors, which has emerged from a new appreciation of their somatic genomic landscapes (15–20).

## Histologic Classification of Endometrial Carcinomas

### ENDOMETRIOID ENDOMETRIAL CARCINOMA

Endometrioid endometrial carcinomas represent approximately 87%–90% of all diagnosed endometrial carcinomas (21). They are frequently estrogen-dependent tumors associated with epidemiologic risk factors that lead to unopposed estrogen exposure, including obesity, nulliparity, early age at menarche, and late age at menopause (22, 23). They may be preceded by hyperplasia, atypical hyperplasia, and endometrial intraepithelial neoplasia, which is a premalignant outgrowth from benign endometrial hyperplasia [reviewed in (24)]. Most endometrioid tumors are diagnosed at an early clinical stage and are associated with an overall favorable prognosis (25). Treatment strategies for endometrioid endometrial carcinoma are guided not only by stage but also by tumor grade and depth of myometrial invasion, because a high tumor grade (grade 3) and/or infiltration of >50% of the myometrium are predictors of an increased risk for tumor recurrence [reviewed in (5)]. The treatment for patients with advanced-stage or recurrent disease is highly variable (26). The prognosis for advanced-stage disease is relatively poor, with one study noting 5-year overall-survival rates of 36%–56% for stage III disease and 21%–22% for stage IV disease (25). Although a number of molecularly targeted therapeutics are in clinical trials for endometrial carcinoma [reviewed in

protein; *RBMX*, RNA binding motif protein, X-linked; *TNFAIP6*, tumor necrosis factor, alpha-induced protein 6; *ZFX3*, zinc finger homeobox 3; *RPL22*, ribosomal protein L22; *ATR*, ataxia telangiectasia and Rad3 related; *CCND1*, cyclin D1; *CHD4*, chromodomain helicase DNA binding protein 4; *SPOP*, speckle-type POZ protein; *BCOR*, BCL6 corepressor; *CSMD3*, CUB and Sushi multiple domains 3; *MECOM*, MDS1 and EVI1 complex locus; *METTL14*, methyltransferase like 14; *SGK1*, serum/glucocorticoid regulated kinase 1; *SOX17*, SRY (sex determining region Y)-box 17; *FBXW7*, F-box and WD repeat domain containing 7, E3 ubiquitin protein ligase; *CDKN1A*, cyclin-dependent kinase inhibitor 1A (p21, Cip1); *TAF1*, TAF1 RNA polymerase II, TATA box binding protein (TBP)-associated factor, 250kDa; *HCFC1R1*, host cell factor C1 regulator 1 (XPO1 dependent); *CTDSPL*, CTD (carboxy-terminal domain, RNA polymerase II, polypeptide A) small phosphatase-like; *YIPF3*, Yip1 domain family, member 3; *FAM132A*, family with sequence similarity 132, member A; *CCNE1*, cyclin E1; *MYC*, v-myc avian myelocytomatosis viral oncogene homolog; *MBD3*, methyl-CpG binding domain protein 3; *MKI67*, antigen identified by monoclonal antibody Ki-67; *FAT3*, FAT atypical cadherin 3; *SPTA1*, spectrin, alpha, erythrocytic 1 (elliptocytosis 2); *FAM135B*, family with sequence similarity 135, member B; *KMT2B*, lysine (K)-specific methyltransferase 2B (also known as: *MLL4*, myeloid/lymphoid or mixed-lineage leukemia protein 4); *USH2A*, Usher syndrome 2A (autosomal recessive, mild); *RRN3P2*, RNA polymerase I transcription factor homolog (*S. cerevisiae*) pseudogene 2; *CDH19*, cadherin 19, type 2; *USP9X*, ubiquitin specific peptidase 9, X-linked; *COL11A1*, collagen, type XI, alpha 1; *ZNF770*, zinc finger protein 770; *SLC9C2*, solute carrier family 9, member C2 (putative); *PNN*, pinin, desmosome associated protein; *INPP4A*, inositol polyphosphate-4-phosphatase, type I, 107kDa; *AMY2B*, amylase, alpha 2B (pancreatic); *SIN3A*, SIN3 transcription regulator family member A; *HOXA7*, homeobox A7; *HPD*, 4-hydroxyphenylpyruvate dioxygenase; *NFE2L2*, nuclear factor, erythroid 2-like 2; *ESR1*, estrogen receptor 1.

<sup>3</sup> See Tables 1 and 2 for the gene names for symbols not expanded on their first appearance in the text.

(5, 21)], there are currently no targeted therapies approved by the US Food and Drug Administration for this tumor type.

Over the past 2 decades in the era preceding next-generation sequencing, much effort was devoted to understanding the genetic etiology of endometrioid endometrial carcinomas [reviewed in (24)]. Most endometrioid endometrial carcinomas tend to be chromosomally stable, with diploid or near-diploid genomes (27). At the molecular level, these carcinomas are characterized by high-frequency genetic alterations in the *PIK3CA*, *PIK3R1*, and *PTEN* genes that produce inappropriate activation of the PI3K (phosphoinositide 3-kinase)<sup>4</sup> pathway (28–32). *ARID1A*, which encodes the BAF250A tumor suppressor, is somatically mutated in 40% of low-grade endometrioid endometrial carcinomas [reviewed in (24)]. Loss of BAF250A protein is likewise frequent and has been detected in 19% to 34% of endometrioid endometrial carcinomas overall, 26% to 29% of low-grade endometrioid endometrial carcinomas, 39% of high-grade endometrioid endometrial carcinomas, and 16% of endometrial hyperplasias with atypia suggesting that this phenomenon is an initiating event in endometrioid endometrial tumorigenesis [(33–35); reviewed in (24)]. Other signal transduction pathways that are frequently disrupted in endometrioid endometrial carcinomas include the RAS-RAF-MEK-ERK pathway, which is disrupted by somatic mutations in *KRAS* (approximately 18% of cases) or by hypermethylation of the *RASSF1* [Ras association (RalGDS/AF-6) domain family member 1; alias, *RASSF1A*] promoter (62%–74% of cases) [(36); reviewed in (24)]. Somatic mutations in the *FGFR2* receptor tyrosine kinase occur in approximately 12% of endometrioid endometrial carcinomas (36, 37). *FGFR2* mutations and *KRAS* mutations are mutually exclusive (36). Although mutual exclusivity implies functional redundancy, the clinical correlates of *KRAS* and *FGFR2* mutations are different, indicating possible differences in their biological effects (36). Endometrioid endometrial carcinomas often show disruption of the canonical WNT signaling pathway owing to somatic mutation of the *CTNNB1* gene (2%–45% of cases) and stabilization of  $\beta$ -catenin (36, 38, 39). Recent findings that *CTNNB1* and *KRAS* mutations are mutually exclusive in endometrioid endometrial carcinomas have led to the proposal that functional cross talk between the RAS-RAF-MEK-ERK and WNT/TCF signaling pathways may occur in this

cell type or that functional redundancy exists in the biological consequences of altered RAS-RAF-MEK-ERK and WNT/TCF signaling (36). In addition, endometrioid tumors often exhibit microsatellite instability (MSI), with an incidence of 34% MSI positivity noted in a recent large single-institution study of 466 cases (36) and 40% MSI positivity noted among endometrioid endometrial carcinomas selected for analysis by The Cancer Genome Atlas (TCGA) (15). The MSI phenotype in sporadic endometrial carcinomas has been attributed to defective mismatch repair, primarily due to hypermethylation of the *MLH1* promoter, as well as to low-frequency somatic mutations in *MSH6* and loss of *MSH2* expression (40–42).

#### SEROUS ENDOMETRIAL CARCINOMA

Serous endometrial carcinomas, high-grade tumors that are often metastatic at presentation, have an associated 5-year relative survival rate of only 44.7%, compared with 91.2% for endometrioid endometrial carcinoma (43). Although they are rare at diagnosis, serous carcinomas are clinically aggressive and contribute substantially to the mortality from endometrial cancer. In one study, serous tumors constituted only 10% of endometrial cancer diagnoses but accounted for 39% of the deaths (44). Recent epidemiologic evidence suggests that, similar to endometrioid endometrial carcinoma, an increased body mass index may be a risk factor for serous endometrial carcinoma (23). Serous endometrial carcinomas may be preceded by precancerous cells with a so-called p53 signature, by endometrial glandular dysplasia, or by endometrial intraepithelial carcinoma [reviewed in (45)]. Treatment approaches for serous endometrial carcinoma are variable but generally include surgical staging and cytoreduction, followed by adjuvant chemotherapy and/or radiotherapy [reviewed in (46, 47)].

Although the genomic landscape of serous endometrial carcinoma has recently been deciphered (15–18), prior molecular studies of individual genes and pathways have established that serous endometrial carcinomas are characterized by a high frequency (up to 90% of cases) of somatic mutations in *TP53* and/or p53 stabilization (48, 49). *TP53*/p53 abnormalities are believed to be initiating events in the development of serous endometrial cancer on the basis of their occurrence in premalignant cells, in endometrial glandular dysplasia, and in endometrial intraepithelial carcinoma [reviewed in (24)]. Consistent with the idea that p53 dysregulation is an initiating event in serous endometrial tumorigenesis, mice with conditional deletion of *TP53* in the genitourinary tract develop non-endometrioid endometrial carcinomas, including serous carcinomas (50). In addition to p53 alterations, human serous endometrial carcinomas also harbor fre-

<sup>4</sup> Nonstandard abbreviations: PI3K, phosphoinositide 3-kinase; MSI, microsatellite instability; TCGA, The Cancer Genome Atlas; L1CAM, L1 cell adhesion molecule; EpCAM, epithelial cell adhesion molecule; IMP3, insulin-like growth factor 2 mRNA-binding protein 3; RTK, receptor tyrosine kinase.

quent somatic mutations in the *PPP2R1A* gene (which encodes a subunit of the PP2A phosphatase) and in the *PIK3CA*, *PIK3R1*, and *PTEN* genes within the PI3K pathway [reviewed in (24)]. Increased amounts of the cell cycle proteins cyclin E and p16, amplification and overexpression of the *ERBB2* [v-erb-b2 avian erythroblastic leukemia viral oncogene homolog 2] gene (which encodes the ERBB2 receptor tyrosine kinase), loss of BAF250A production, and altered amounts of the cell adhesion proteins claudin-3, claudin-4, L1CAM (L1 cell adhesion molecule), EpCAM (epithelial cell adhesion molecule), and E-cadherin have also been documented [reviewed in (24)].

#### HIGH-GRADE ENDOMETRIAL CARCINOMA

A substantial proportion of high-grade endometrial carcinomas can be difficult to classify reproducibly according to histologic subtype [reviewed in (51)]. For example, one study noted discordant subtype classification in approximately one-third of high-grade endometrial tumors (52). The difficulty in unambiguously classifying some high-grade endometrial carcinomas is problematic, because different histologic subtypes have different clinical behaviors and different treatment considerations [reviewed in (53)]. Immunohistochemical phenotyping for markers such as p53, estrogen receptor, progesterone receptor, PTEN, IMP3 (insulin-like growth factor 2 mRNA-binding protein 3), and p16 may serve as informative adjuncts to traditional histopathology for the classification of high-grade endometrial tumors, because unambiguously assigned histologic subtypes tend to show characteristic differences in the expression patterns of genes encoding these markers (54–56). In a combined analysis of immunohistochemical staining of grade 3 endometrioid endometrial carcinomas for MLH1, MSH2, p16, cyclin D1, ERBB2, WT1, and p53, 37% of cases had molecular profiles that resembled endometrioid carcinomas, and the other 63% of cases resembled serous carcinomas at the molecular level (57). In the future, mutational profiles may also be useful adjuncts to histopathologic classification. For example, significant differences have been noted in the frequencies of mutations among the *ARID1A*, *PTEN*, *PIK3CA*, *PPP2R1A* (protein phosphatase 2, regulatory subunit A, alpha), *TP53*, and *CTNNB1* genes in low-grade endometrioid endometrial carcinoma, high-grade endometrioid endometrial carcinoma, serous endometrial carcinoma, and endometrial carcinosarcomas, and the pattern of mutations in this 6-gene set has facilitated the histologic reclassification of some endometrial tumors (58). As we discuss later in this review, an integrated genomic analysis of endometrioid and serous endometrial carcinomas by TCGA has revealed that 19.6% of histologically classified high-grade (grade 3) endometrioid endometrial

carcinomas in that study have genomic profiles that resemble those of serous carcinomas (15).

#### Molecular Classification of Endometrioid and Serous Endometrial Carcinomas

Although much progress has been made over the past several decades toward understanding the molecular etiology of endometrial carcinomas, the very recent application of next-generation sequencing to comprehensively search for somatic alterations in endometrial carcinomas has led to a rapid and substantial shift in our understanding of the molecular events underlying these tumors. Beginning in 2012, several studies, including one from our own group, reported the results of systematic searches for somatic mutations in serous and endometrioid endometrial carcinomas in the approximately 22 000 protein-encoding genes that constitute the exome (16–20). The first large-scale, fully integrated genomic analysis of endometrial carcinomas, which was reported in 2013 by TCGA (15), used whole-exome sequencing, whole-transcriptome sequencing, genome-wide copy number analysis, expression profiling, reverse-phase protein array, methylation profiling, and MSI assessment to interrogate 186 endometrioid, 42 serous, and 4 mixed-histology endometrial carcinomas in an integrated manner (15). A subset of TCGA tumors ( $n = 107$ ) was also subjected to low-pass whole-genome sequencing to identify structural variants. Together, these studies have provided critical new insights into the molecular features of serous and endometrioid endometrial carcinomas, including the first observation (reported by TCGA)—based on an integrated analysis of somatic mutation rates, frequency of copy number alterations, and MSI status—that endometrial carcinomas can be broadly classified into 4 distinct molecular subgroups. The following sections provide an overview of the most salient features of the 4 molecular subgroups identified by TCGA. These subgroups are termed “*POLE* ultramutated,” “hypermutated/microsatellite-unstable,” “copy number low/microsatellite-stable” “copy number high (serous-like).”

##### *POLE* ULTRAMUTATED SUBGROUP

As the name suggests, ultramutated tumors have an extraordinarily high mutation rate ( $232 \times 10^{-6}$  mutations/Mb; 867–9714 mutations/tumor) and an increased incidence of C>A transversions (15). Overall, 6.4% of low-grade endometrioid endometrial carcinomas and 17.4% of high-grade endometrioid endometrial carcinomas—but none of the mixed histology or serous tumors in the TCGA study—were ultramutated. The ultramutated phenotype is attributed to somatic mutations in the exonuclease domain of *POLE*,



which encodes the catalytic and proofreading subunit of the polymerase  $\epsilon$  holoenzyme that catalyzes leading-strand synthesis during DNA replication and regulates cell cycle progression, chromatin remodeling, and DNA repair (59). In an earlier study, Church et al. described somatic mutations in the exonuclease domain of *POLE* in 7% of endometrioid, 25% of serous, and 33% of mixed-histology endometrial carcinomas, although it is important to note that the total number of serous and mixed-histology tumors in that study was small (60). Church et al. also noted a significant increase in the incidence of *POLE* mutations with high tumor grade (4.7% grade 1 tumors vs. 1.7% grade 2 tumors vs. 22.2% grade 3 tumors;  $P = 0.001$ ) (60).

TCGA uncovered 190 significantly mutated genes (defined in that study as having a false-discovery rate in the convolution test of  $\leq 2\%$ ) among *POLE* ultramutated tumors. Significantly enriched pathways ( $P$  values  $< 0.01$ ) associated with this subgroup involve gluconeogenesis, glycolysis, clathrin-mediated endocytosis signaling, tRNA charging, tricarboxylic acid cycle II (eukaryotic), and actin cytoskeleton signaling. Although the number of ultramutated endometrial carcinomas that have been described thus far is small, it is noteworthy that the progression-free survival of patients in the ultramutated subgroup are more favorable than for other molecular subgroups [hypermutated/microsatellite-unstable, copy number low/microsatellite-stable, or copy number high (serous-like)] (15).

#### HYPERMUTATED/MICROSATELLITE-UNSTABLE SUBGROUP

The so-called hypermutated/microsatellite-unstable endometrial cancer subgroup is composed of microsatellite-unstable tumors that have low-level somatic copy number alterations (15). Consistent with their MSI phenotype, the hypermutated/microsatellite-unstable subgroup also displays frequent *MLH1* promoter methylation and reduced *MLH1* gene expression. Hypermutated/microsatellite-unstable tumors are also associated with a heavily methylated subgroup suggestive of a CpG methylator phenotype. In the TCGA tumor cohort, 28.6% of low-grade endometrioid endometrial carcinomas and 54.3% of high-grade endometrioid endometrial carcinomas were within the hypermutated/microsatellite-unstable subgroup. This observation is consistent with earlier reports that MSI positivity occurs at a significantly higher frequency in high-grade endometrioid endometrial carcinomas than in low-grade endometrioid endometrial carcinomas (61–63). None of the mixed-histology or serous endometrial carcinomas in the TCGA cohort were within the hypermutated/microsatellite-unstable subgroup (15). The absence of serous endometrial carcinomas from the hypermutated/microsatellite-

unstable subgroup is in accord with the infrequent (0%–4%) occurrence of MSI documented in serous tumors by TCGA and in earlier analyses of other large cohorts of serous endometrial carcinoma (15, 18, 58, 64).

Twenty-one significantly mutated genes (candidate pathogenic driver genes) have been identified in the hypermutated/microsatellite-unstable subgroup (Table 1), including 11 genes (*ARID5B*, *CSDE1*, *CTCF*, *GIGYF2*, *HIST1H2BD*, *LIMCH1*, *MIR1277*, *NKAP*, *RBMX*, *TNFAIP6*, *ZFH3X3*) that were not previously known to be significantly mutated in endometrial carcinoma. Most of the remaining significantly mutated genes (*PTEN*, *PIK3CA*, *PIK3R1*, *ARID1A*, *RPL22*, *KRAS*, *CTNNB1*, *ATR*, *FGFR2*, *CCND1*) have well-documented roles in the endometrioid subtype, as discussed earlier in this review and elsewhere (24, 65). The role of *RPL22* in endometrioid endometrial carcinomas is emerging. Somatic mutations at a polynucleotide tract within *RPL22*, which lead to protein truncation, were previously demonstrated to occur in 52% of MSI-high endometrioid endometrial carcinomas and to correlate with a later age at diagnosis (67 vs. 63 years,  $P = 0.0005$ ) (66). Although the functional effect of *RPL22* mutations in endometrial cancer remains to be determined, it is noteworthy that *RPL22* has been suggested to be a haploinsufficient tumor suppressor gene, based on observations that 10% of primary T-cell acute lymphoblastic leukemias exhibit monoallelic deletion of *RPL22* and that haploinsufficiency for *RPL22* accelerates tumorigenesis in a mouse model of T-cell lymphoma (67).

In addition to significantly mutated genes, a number of significantly enriched pathways have been recognized in the hypermutated/microsatellite-unstable subgroup, including the threonine degradation II, glycine degradation, and anandamide degradation pathways. The RTK (receptor tyrosine kinase)/RAS/ $\beta$ -catenin pathway is altered in 69.5% of hypermutated/microsatellite-unstable tumors and the *PIK3CA*-*PIK3R1*-*PTEN* axis is genomically altered in 95.5% of cases. As noted previously, targeted therapies directed against the PI3K pathway are currently being evaluated in clinical trials for the treatment of endometrial cancer [reviewed in (21)]. *KRAS* alterations, which may confer resistance to PI3K pathway inhibitors [reviewed in (68)], were observed in 35% of hypermutated/microsatellite-unstable endometrial tumors (15). An earlier, large study of endometrioid endometrial carcinomas demonstrated that somatic mutations in *KRAS* and *FGFR2* were significantly more frequent among MSI-positive than MSI-negative endometrioid tumors, whereas *CTNNB1* mutations were significantly more frequent among MSI-negative tumors (36).

**Table 1. Significantly mutated genes (SMGs) in 3 molecular subgroups of endometrial cancer.<sup>a</sup>**

| Molecular subgroup                        | No. of SMGs | Gene symbol              | Gene name                                                               | Somatic-mutation frequency |
|-------------------------------------------|-------------|--------------------------|-------------------------------------------------------------------------|----------------------------|
| Hypermutated/microsatellite-unstable      | 21          | <i>PTEN</i>              | Phosphatase and tensin homolog                                          | 87.7%                      |
|                                           |             | <i>PIK3CA</i>            | Phosphatidylinositol-4,5-bisphosphate 3-kinase, catalytic subunit alpha | 53.8%                      |
|                                           |             | <i>PIK3R1</i>            | Phosphoinositide-3-kinase, regulatory subunit 1 (alpha)                 | 41.5%                      |
|                                           |             | <i>ARID1A</i>            | AT rich interactive domain 1A (SWI-like)                                | 36.9%                      |
|                                           |             | <i>RPL22</i>             | Ribosomal protein L22                                                   | 36.9%                      |
|                                           |             | <i>KRAS</i>              | Kirsten rat sarcoma viral oncogene homolog                              | 35.4%                      |
|                                           |             | <i>ZFH3</i>              | Zinc finger homeobox 3                                                  | 30.8%                      |
|                                           |             | <i>ARID5B</i>            | AT rich interactive domain 5B (MRF1-like)                               | 23.1%                      |
|                                           |             | <i>CTCF</i>              | CCCTC-binding factor (zinc finger protein)                              | 23.1%                      |
|                                           |             | <i>CTNNB1</i>            | Catenin (cadherin-associated protein), beta 1, 88kDa                    | 20.0%                      |
|                                           |             | <i>ATR</i>               | Ataxia telangiectasia and Rad3 related                                  | 18.5%                      |
|                                           |             | <i>GIGYF2</i>            | GRB10 interacting GYF protein 2                                         | 16.9%                      |
|                                           |             | <i>CSDE1</i>             | Cold shock domain containing E1, RNA-binding                            | 15.4%                      |
|                                           |             | <i>FGFR2</i>             | Fibroblast growth factor receptor 2                                     | 13.8%                      |
|                                           |             | <i>CCND1</i>             | Cyclin D1                                                               | 12.3%                      |
|                                           |             | <i>LIMCH1</i>            | LIM and calponin homology domains 1                                     | 12.3%                      |
|                                           |             | <i>RBMX</i>              | RNA binding motif protein, X-linked                                     | 12.3%                      |
|                                           |             | <i>NKAP</i>              | NFKB activating protein                                                 | 10.8%                      |
|                                           |             | <i>HIST1H2BD</i>         | Histone cluster 1, H2bd                                                 | 7.7%                       |
|                                           |             | <i>TNFAIP6</i>           | Tumor necrosis factor, alpha-induced protein 6                          | 7.7%                       |
|                                           |             | <i>MIR1277</i>           | microRNA 1277                                                           | 6.2%                       |
| Copy number low/<br>microsatellite-stable | 16          | <i>PTEN</i>              | Phosphatase and tensin homolog                                          | 76.7%                      |
|                                           |             | <i>PIK3CA</i>            | Phosphatidylinositol-4,5-bisphosphate 3-kinase, catalytic subunit alpha | 53.3%                      |
|                                           |             | <i>CTNNB1</i>            | Catenin (cadherin-associated protein), beta 1, 88kDa                    | 52.2%                      |
|                                           |             | <i>ARID1A</i>            | AT rich interactive domain 1A (SWI-like)                                | 42.2%                      |
|                                           |             | <i>PIK3R1</i>            | Phosphoinositide-3-kinase, regulatory subunit 1 (alpha)                 | 33.3%                      |
|                                           |             | <i>CTCF</i>              | CCCTC-binding factor (zinc finger protein)                              | 21.1%                      |
|                                           |             | <i>KRAS</i>              | Kirsten rat sarcoma viral oncogene homolog                              | 15.6%                      |
|                                           |             | <i>FGFR2</i>             | Fibroblast growth factor receptor 2                                     | 13.3%                      |
|                                           |             | <i>CHD4</i>              | Chromodomain helicase DNA binding protein 4                             | 12.2%                      |
|                                           |             | <i>SPOP</i>              | Speckle-type POZ protein                                                | 10.0%                      |
|                                           |             | <i>CSMD3<sup>b</sup></i> | CUB and Sushi multiple domains 3                                        | 10.0%                      |
|                                           |             | <i>SOX17</i>             | SRY (sex determining region Y)-box 17                                   | 7.8%                       |
|                                           |             | <i>SGK1</i>              | Serum/glucocorticoid regulated kinase 1                                 | 6.7%                       |
|                                           |             | <i>BCOR</i>              | BCL6 corepressor                                                        | 6.7%                       |
|                                           |             | <i>MECOM</i>             | MDS1 and EVI1 complex locus                                             | 4.4%                       |
|                                           |             | <i>METTL14</i>           | Methyltransferase like 14                                               | 3.3%                       |
| Copy number high (serous-like)            | 8           | <i>TP53</i>              | Tumor protein p53                                                       | 91.7%                      |
|                                           |             | <i>PIK3CA</i>            | Phosphatidylinositol-4,5-bisphosphate 3-kinase, catalytic subunit alpha | 46.7%                      |
|                                           |             | <i>FBXW7</i>             | F-box and WD repeat domain containing 7, E3 ubiquitin protein ligase    | 21.7%                      |
|                                           |             | <i>PPP2R1A</i>           | Protein phosphatase 2, regulatory subunit A, alpha                      | 21.7%                      |
|                                           |             | <i>PIK3R1</i>            | Phosphoinositide-3-kinase, regulatory subunit 1 (alpha)                 | 13.3%                      |
|                                           |             | <i>CHD4</i>              | Chromodomain helicase DNA binding protein 4                             | 13.3%                      |
|                                           |             | <i>PTEN</i>              | Phosphatase and tensin homolog                                          | 10.0%                      |
|                                           |             | <i>CSMD3<sup>b</sup></i> | CUB and Sushi multiple domains 3                                        | 10.0%                      |

<sup>a</sup> The Cancer Genome Atlas Research Network et al. (15).<sup>b</sup> Probable false positive [Lawrence et al. (70)].

Historically, there has been considerable inter-study variability regarding whether MSI status is associated with the clinical outcome of endometrial cancer. Factors proposed to account for this variability include differences in the numbers of patients between studies, as well as differences in the histopathologic composition of study cohorts (61). A recent large single-institution study of endometrioid endometrial cancer cases observed no significant correlation between MSI status and either overall survival or disease-free survival (61). Moreover, a recently published metaanalysis of 23 studies, including the aforementioned study (61), also observed no significant correlation between MSI and clinical outcome for endometrial cancer (69).

#### COPY NUMBER-LOW/MICROSATELLITE-STABLE SUBGROUP

The copy number-low/microsatellite-stable subgroup described by TCGA included 60.0% of low-grade endometrioid carcinomas, 8.7% of high-grade endometrioid carcinomas, 2.3% of serous carcinomas, and 25% of mixed-histology carcinomas. Sixteen significantly mutated genes were discerned in this molecular subgroup (Table 1): 9 genes previously implicated in endometrial cancer (*PTEN*, *PIK3CA*, *CTNNB1*, *ARID1A*, *PIK3R1*, *KRAS*, *FGFR2*, *CHD4*, *SPOP*) by us and others [(17, 18); reviewed in (24)], and 7 genes (*BCOR*, *CSMD3*, *CTCF*, *MECOM*, *METTL14*, *SGK1*, *SOX17*) not previously recognized to have a role in endometrial tumorigenesis. Although significantly mutated genes are generally indicative of probable pathogenic driver genes, the designation of *CSMD3* as a significantly mutated gene in endometrial cancer likely reflects the inadequacy of statistical algorithms to account for the observations that late-replicating genes and low-expressed genes, such as *CSMD3*, exhibit higher background mutation rates than early-replicating genes or highly expressed genes (70). Therefore, the designation of *CSMD3* as a significantly mutated gene in endometrial cancer likely reflects an increased background mutation rate rather than the accumulation of pathogenic driver mutations (70).

Almost all (92%) of the tumors in this subgroup have somatically altered the PI3K pathway. *KRAS* is altered in 16% of cases, considerably lower than the frequency of *KRAS* mutation in hypermutated/microsatellite-unstable endometrial carcinomas, which is in accord with earlier observations that *KRAS* mutations are significantly more common in microsatellite-unstable endometrioid tumors than in microsatellite-stable endometrioid tumors (36). The RTK/RAS/ $\beta$ -catenin pathway is also altered at high frequency (83%) among copy number-low/microsatellite-stable tumors, and within this pathway somatic mutations in *CTNNB1* are particularly prevalent (52%). Mutations

in *SOX17*, which regulate  $\beta$ -catenin, are observed exclusively in this subgroup.

#### COPY NUMBER-HIGH (SEROUS-LIKE) SUBGROUP

In the TCGA study, 5.0% of low-grade endometrioid carcinomas, 19.6% of high-grade endometrioid carcinomas, 97.7% of serous carcinomas, and 75% of mixed-histology carcinomas were in the copy number-high tumor subgroup. That almost all serous endometrial carcinomas in the TCGA study are deemed copy number high is consistent with previous reports that serous endometrial carcinomas are often aneuploid and chromosomally unstable (16, 17, 71, 72).

The TCGA study described 8 significantly mutated genes, including *CSMD3*, among the 60 copy number-high (serous-like) tumors (Table 1). The inclusion of *CSMD3*, as discussed earlier in this review, probably reflects a statistical artifact rather than *CSMD3* being a bona fide driver gene. The other significantly mutated genes in the serous-like subgroup were *TP53*, *PIK3CA*, *PTEN*, *PIK3R1*, and *PPP2R1A*, which have well-established roles in serous endometrial tumors [reviewed in (24)], and *FBXW7* and *CHD4*, which we and others previously identified as significantly mutated genes in serous endometrial carcinomas (16–18). With the exception of *CHD4*, each of the aforementioned genes is a bona fide cancer gene. As has previously been noted for *TP53*, the presence of somatic mutations within *FBXW7*, *PIK3CA*, and *PPP2R1A* in serous intra-epithelial carcinoma and concurrent serous endometrial carcinomas implicates mutation of these genes as early events in the development of serous endometrial cancer (16). The functional consequences of mutations in *CHD4*, which encodes the catalytic subunit of the NuRD chromatin-remodeling complex, remain to be elucidated; however, the designation of *CHD4* as a significantly mutated gene in serous and serous-like tumors (15, 17, 18) and the presence of mutation hot spots within this gene strongly suggest it is likely to be a causal driver gene.

Other genes that have emerged as significantly mutated genes in whole-exome sequencing studies of serous endometrial carcinomas are *SPOP*, a putative tumor suppressor gene; *CDKN1A* [cyclin-dependent kinase inhibitor 1A (p21, Cip1)], a bona fide cancer gene; *TAF1*; *HCFC1R1* [host cell factor C1 regulator 1 (XPO1 dependent)]; *CTDSPL* [CTD (carboxy-terminal domain, RNA polymerase II, polypeptide A) small phosphatase-like]; *YIPF3* (Yip1 domain family, member 3); and *FAM132A* (family with sequence similarity 132, member A) (17, 18). In terms of biological processes, genes that are involved in chromatin remodeling and ubiquitin-mediated protein degradation are frequently mutated in serous endometrial tumors (18). That is not to say that chromatin-remodeling genes

and genes of the ubiquitin ligase complex are not also perturbed in the endometrioid subtype; indeed, a number of chromatin-remodeling genes, such as *ARID1A*, *ARID5B*, *CTCF*, and *CHD4*, are also causal or candidate driver genes in molecular subgroups dominated by endometrioid endometrial tumors (Table 1).

Statistical methods have been used to define a number of genomic regions of significant copy number alteration in serous-like tumors, including regions of focal amplification involving the *MYC* (v-myc avian myelocytomatosis viral oncogene homolog) oncogene, the *ERBB2* (*HER2*) receptor tyrosine kinase gene, and *CCNE1* (cyclin E1), which are each focally amplified in 23%–25% of cases (15). The mutual exclusivity in serous tumors of *CCNE1* amplification and somatic alterations affecting *FBXW7*, which normally mediates the ubiquitin-mediated degradation of cyclin E, suggests that these genetic events are functionally redundant (16). The observation of frequent *MYC*, *ERBB2*, and *CCNE1* gene amplification in serous-like endometrial carcinomas is consistent with prior observations of serous endometrial carcinomas [(16, 17); reviewed in (24)]. Numerous additional genes of interest, including *PIK3CA*, *FBXW7*, *CHD4*, and *MBD3* (methyl-CpG binding domain protein 3), are located within larger regions of copy number alteration in serous and serous-like endometrial carcinomas (15–17).

Copy number–high (serous-like) endometrial tumors have a DNA methylation pattern similar to that of the normal endometrium. A large proportion (85%) of tumors in the copy number–high (serous-like) subgroup are also within a so-called mitotic subgroup, defined by altered mRNA production for genes involved in cell cycle regulation (15). RNA sequencing has also revealed transcriptional differences that form significantly enriched pathways in the copy number–high (serous-like) subgroup, including G<sub>1</sub>/S checkpoint regulation, growth hormone signaling, Her-2 signaling in breast cancer, endothelin-1 signaling, cyclins and cell cycle regulation, and molecular mechanisms of cancer (15). Furthermore, in the serous-like molecular subgroup, increased p53 protein levels and decreased phospho-AKT protein levels have been noted by reverse-phase protein array analysis (15).

The simultaneous assessment of the entire complement of protein-encoding genes by TCGA revealed that most of the *ERBB2*-amplified serous-like tumors also were *PIK3CA* mutated ( $P = 0.038$ ). As noted (15), the co-occurrence of *ERBB2* amplification and *PIK3CA* mutation in serous-like tumors may be clinically relevant, because in *ERBB2*-overexpressing breast cancer cell lines, activating mutations in *PIK3CA* are associated with decreased sensitivity to trastuzumab and lapatinib, therapeutic agents that target *ERBB2*

(73, 74). This observation illustrates the importance of evaluating the larger genomic context of druggable targets when, for example, considering the design and interpretation of clinical trials assessing targeted therapies. A small number of studies have assessed the clinical efficacy of trastuzumab for the treatment of *ERBB2*-positive advanced or recurrent endometrial cancer [reviewed in (75)], and additional clinical trials of trastuzumab or lapatinib for treating endometrial cancer are ongoing or planned (NCT01367002, NCT01454479). As these and other trials of targeted therapies directed against *ERBB2* in endometrial cancer proceed, it may be useful to assess whether *PIK3CA* mutation status has an effect on clinical response. The *PIK3CA*-*PIK3R1*-*PTEN* axis itself is altered in 73% of copy number–high (serous-like) tumors, whereas *KRAS* is mutated or amplified in 8% of serous-like tumors (15). The clinical efficacy of therapeutic agents targeting the PI3K/AKT/mTOR pathway in the treatment of endometrial cancer has recently been reviewed elsewhere (68).

One of the most interesting findings from the genomic analysis of endometrial tumors is that approximately one-fifth of tumors classified as grade 3 endometrioid endometrial carcinomas are “serous-like” at the molecular level. As noted in the TCGA study, the distinction between the histologic and molecular classification of these cases has important clinical implications—suggesting that patients who have grade 3 endometrioid endometrial carcinomas with a serous-like genomic profile might be treated more appropriately with regimens that are used for serous carcinoma. As is discussed earlier in this review, a subset of high-grade endometrial tumors is difficult to classify accurately by subtype at the histologic level. The new-found realization that serous and endometrioid endometrial tumors can be molecularly classified into 4 distinct subgroupings may provide future opportunities to devise a panel of biomarkers, or indeed use integrated genomic profiling, to augment the traditional histopathologic classification of endometrial carcinomas. In this regard, it is notable that 48 significantly mutated genes are altered at different frequencies across the 4 molecular subgroups of endometrial carcinoma reported by TCGA (Table 2). How the genomic profiles of endometrioid and serous endometrial carcinomas relate to the genomic profiles of other endometrial carcinoma subtypes remains to be determined.

## Conclusions and Future Perspectives

In the past year, the pace of mutation discovery in endometrial cancer has been unprecedented. To date, the exomes of 96 serous and 233 endometrioid endometrial carcinomas have been deciphered (15–20). The



**Table 2. Forty-eight SMGs mutated at different frequencies across 4 molecular subgroups of serous and endometrioid endometrial cancers.<sup>a</sup>**

| Gene Symbol           | Gene Name                                                                           | Mutation frequency         |                                               |                                                |                                         |     | All 4 subgroups (n = 232) |
|-----------------------|-------------------------------------------------------------------------------------|----------------------------|-----------------------------------------------|------------------------------------------------|-----------------------------------------|-----|---------------------------|
|                       |                                                                                     | POLE ultramutated (n = 17) | Hypermutated/microsatellite unstable (n = 65) | Copy number low/microsatellite stable (n = 90) | Copy number high (serous-like) (n = 60) |     |                           |
| TP53                  | Tumor protein p53                                                                   | 35%                        | 8%                                            | 1%                                             | 92%                                     | 29% |                           |
| PTEN                  | Phosphatase and tensin homolog                                                      | 94%                        | 88%                                           | 77%                                            | 10%                                     | 64% |                           |
| POLE                  | Polymerase (DNA directed), epsilon, catalytic subunit                               | 100%                       | 8%                                            | 3%                                             | 2%                                      | 11% |                           |
| MKI67                 | Antigen identified by monoclonal antibody Ki-67                                     | 94%                        | 18%                                           | 2%                                             | 0%                                      | 13% |                           |
| FAT3                  | FAT tumor suppressor homolog 3 ( <i>Drosophila</i> )                                | 76%                        | 31%                                           | 1%                                             | 0%                                      | 15% |                           |
| TAF1                  | TAF1 RNA polymerase II, TATA box binding protein (TBP)-associated factor, 250kDa    | 82%                        | 25%                                           | 1%                                             | 5%                                      | 15% |                           |
| ZFXH3                 | Zinc finger homeobox 3                                                              | 82%                        | 31%                                           | 2%                                             | 7%                                      | 17% |                           |
| RPL22                 | Ribosomal protein L22                                                               | 29%                        | 37%                                           | 0%                                             | 0%                                      | 13% |                           |
| SPTA1                 | Spectrin, alpha, erythrocytic 1 (elliptocytosis 2)                                  | 76%                        | 14%                                           | 6%                                             | 0%                                      | 12% |                           |
| FAM135B               | Family with sequence similarity 135, member B                                       | 76%                        | 11%                                           | 4%                                             | 2%                                      | 11% |                           |
| CSMD3 <sup>b</sup>    | CUB and Sushi multiple domains 3                                                    | 94%                        | 22%                                           | 10%                                            | 10%                                     | 19% |                           |
| GIGYF2                | GRB10 interacting GYF protein 2                                                     | 59%                        | 20%                                           | 0%                                             | 7%                                      | 12% |                           |
| CSDE1                 | Cold shock domain containing E1, RNA-binding                                        | 59%                        | 15%                                           | 1%                                             | 0%                                      | 9%  |                           |
| KMT2B <sup>c</sup>    | Lysine (K)-specific methyltransferase 2B                                            | 65%                        | 22%                                           | 4%                                             | 0%                                      | 13% |                           |
| ATR                   | Ataxia telangiectasia and Rad3 related                                              | 65%                        | 9%                                            | 0%                                             | 2%                                      | 8%  |                           |
| CTNNB1                | Catenin (cadherin-associated protein), beta 1, 88kDa                                | 41%                        | 20%                                           | 52%                                            | 3%                                      | 30% |                           |
| USH2A                 | Usher syndrome 2A (autosomal recessive, mild)                                       | 76%                        | 18%                                           | 4%                                             | 5%                                      | 14% |                           |
| LIMCH1                | LIM and calponin homology domains 1                                                 | 53%                        | 12%                                           | 0%                                             | 0%                                      | 7%  |                           |
| RRN3P2                | RNA polymerase I transcription factor homolog ( <i>S. cerevisiae</i> ) pseudogene 2 | 6%                         | 0%                                            | 0%                                             | 0%                                      | 0%  |                           |
| FBXW7                 | F-box and WD repeat domain containing 7, E3 ubiquitin protein ligase                | 82%                        | 9%                                            | 6%                                             | 22%                                     | 16% |                           |
| CDH19                 | Cadherin 19, type 2                                                                 | 59%                        | 5%                                            | 1%                                             | 5%                                      | 7%  |                           |
| USP9X                 | Ubiquitin specific peptidase 9, X-linked                                            | 59%                        | 17%                                           | 1%                                             | 2%                                      | 10% |                           |
| COL11A1               | Collagen, type XI, alpha 1                                                          | 71%                        | 9%                                            | 2%                                             | 8%                                      | 11% |                           |
| BCOR                  | BCL6 corepressor                                                                    | 65%                        | 17%                                           | 7%                                             | 0%                                      | 12% |                           |
| ARID1A                | AT rich interactive domain 1A (SWI-like)                                            | 76%                        | 37%                                           | 42%                                            | 5%                                      | 34% |                           |
| ZNF770                | Zinc finger protein 770                                                             | 41%                        | 5%                                            | 0%                                             | 0%                                      | 4%  |                           |
| Continued on page 107 |                                                                                     |                            |                                               |                                                |                                         |     |                           |

Continued on page 107

**Table 2. Forty-eight SMGs mutated at different frequencies across 4 molecular subgroups of serous and endometrioid endometrial cancers.<sup>a</sup> (Continued from page 106)**

| Gene Symbol    | Gene Name                                               | Mutation frequency                |                                               |                                                |                                         |                           |
|----------------|---------------------------------------------------------|-----------------------------------|-----------------------------------------------|------------------------------------------------|-----------------------------------------|---------------------------|
|                |                                                         | <i>POLR</i> ultramutated (n = 17) | Hypermutated/microsatellite unstable (n = 65) | Copy number low/microsatellite stable (n = 90) | Copy number high (serous-like) (n = 60) | All 4 subgroups (n = 232) |
| <i>ARID5B</i>  | AT rich interactive domain 5B (MRF1-like)               | 47%                               | 23%                                           | 6%                                             | 0%                                      | 12%                       |
| <i>SLC9C2</i>  | Solute carrier family 9, member C2 (putative)           | 53%                               | 5%                                            | 2%                                             | 3%                                      | 7%                        |
| <i>KRAS</i>    | v-Ki-ras2 Kirsten rat sarcoma viral oncogene homolog    | 53%                               | 35%                                           | 16%                                            | 3%                                      | 21%                       |
| <i>PNN</i>     | Pinin, desmosome associated protein                     | 35%                               | 6%                                            | 0%                                             | 0%                                      | 4%                        |
| <i>INPP4A</i>  | Inositol polyphosphate-4-phosphatase, type I, 107kDa    | 29%                               | 9%                                            | 2%                                             | 0%                                      | 6%                        |
| <i>CTCF</i>    | CCCTC-binding factor (zinc finger protein)              | 41%                               | 23%                                           | 21%                                            | 0%                                      | 18%                       |
| <i>CHD4</i>    | Chromodomain helicase DNA binding protein 4             | 65%                               | 6%                                            | 12%                                            | 13%                                     | 15%                       |
| <i>AMY2B</i>   | Amylase, alpha 2B (pancreatic)                          | 29%                               | 8%                                            | 0%                                             | 0%                                      | 4%                        |
| <i>RBMX</i>    | RNA binding motif protein, X-linked                     | 24%                               | 12%                                           | 0%                                             | 0%                                      | 5%                        |
| <i>PPP2R1A</i> | Protein phosphatase 2, regulatory subunit A, alpha      | 29%                               | 9%                                            | 1%                                             | 22%                                     | 11%                       |
| <i>SIN3A</i>   | SIN3 transcription regulator family member A            | 35%                               | 14%                                           | 4%                                             | 0%                                      | 8%                        |
| <i>TNFAIP6</i> | Tumor necrosis factor, alpha-induced protein 6          | 29%                               | 2%                                            | 1%                                             | 0%                                      | 3%                        |
| <i>PIK3R1</i>  | Phosphoinositide-3-kinase, regulatory subunit 1 (alpha) | 65%                               | 40%                                           | 33%                                            | 13%                                     | 32%                       |
| <i>SGK1</i>    | Serum/glucocorticoid regulated kinase 1                 | 35%                               | 3%                                            | 6%                                             | 2%                                      | 6%                        |
| <i>HOXA7</i>   | Homeobox A7                                             | 18%                               | 6%                                            | 0%                                             | 0%                                      | 3%                        |
| <i>METTL14</i> | Methyltransferase like 14                               | 24%                               | 5%                                            | 3%                                             | 0%                                      | 4%                        |
| <i>HPD</i>     | 4-hydroxyphenylpyruvate dioxygenase                     | 12%                               | 6%                                            | 0%                                             | 0%                                      | 3%                        |
| <i>MIR1277</i> | MicroRNA 1277                                           | 12%                               | 6%                                            | 0%                                             | 0%                                      | 3%                        |
| <i>CCND1</i>   | Cyclin D1                                               | 18%                               | 12%                                           | 4%                                             | 0%                                      | 6%                        |
| <i>MECOM</i>   | MDS1 and EVI1 complex locus                             | 24%                               | 5%                                            | 4%                                             | 0%                                      | 5%                        |
| <i>NFE2L2</i>  | Nuclear factor, erythroid 2-like 2                      | 12%                               | 11%                                           | 3%                                             | 0%                                      | 5%                        |
| <i>ESR1</i>    | Estrogen receptor 1                                     | 24%                               | 2%                                            | 6%                                             | 2%                                      | 5%                        |

<sup>a</sup> The Cancer Genome Atlas Research Network et al. (15). Mutation frequencies of protein-encoding genes were retrieved via cBioPortal (<http://www.cbioportal.org/public-portal/>). The mutation frequency of *MIR1277* was retrieved via the TCGA data portal (<https://tcga-data.nci.nih.gov/tcga/>).

<sup>b</sup> Probable false positive [Lawrence et al. (70)].

<sup>c</sup> HUGO-approved gene symbol and name. Also known as *MLL4* (myeloid/lymphoid or mixed-lineage leukemia protein 4).

integrated genomic analysis of these 2 subtypes of endometrial cancer by TCGA (15), as well as studies from individual laboratories (16–20), has provided unprecedented insights into the genomic, epigenomic, transcriptomic, and proteomic alterations that are present in serous and endometrioid endometrial tumors. Together, these studies have given the endometrial cancer community the most comprehensive view of the genomic landscape of this disease thus far. It is likely that our view of this landscape—and the genetic and biological context of the alterations that shape it—will continue to be refined and defined by the functional annotation of candidate cancer genes that have emerged from these studies and by the sequencing of additional endometrial tumors, including rare histologic subtypes. Prospective studies assessing the potential clinical utility of these findings will undoubtedly follow. One can envision that the molecular classification of endometrial tumors might assist in guiding a determination of prognosis and treatment decisions, in the discovery of new druggable targets and pathways, and in implementing molecular diagnostics to detect endometrial cancers at an earlier stage in their clinical course, when the prognosis is more favorable. In the latter case, it is noteworthy that the genomic analysis of cells collected during Papanicolaou tests holds promise

for the early detection of endometrial carcinomas (19). In future studies, it will also be important to decipher the genomic landscape of metastatic disease and the precancerous lesions that precede endometrial carcinomas, as well as annotating and functionalizing somatic aberrations in the noncoding regions of the genome in endometrial carcinomas.

**Author Contributions:** All authors confirmed they have contributed to the intellectual content of this paper and have met the following 3 requirements: (a) significant contributions to the conception and design, acquisition of data, or analysis and interpretation of data; (b) drafting or revising the article for intellectual content; and (c) final approval of the published article.

**Authors' Disclosures or Potential Conflicts of Interest:** Upon manuscript submission, all authors completed the author disclosure form. Disclosures and/or potential conflicts of interest:

**Employment or Leadership:** None declared.

**Consultant or Advisory Role:** None declared.

**Stock Ownership:** None declared.

**Honoraria:** None declared.

**Research Funding:** D.W. Bell, Intramural Program of the National Institutes of Health.

**Expert Testimony:** None declared.

**Patents:** D.W. Bell, United States patent US 8,465,916 B2.

## References

1. American Cancer Society. Cancer facts & figures 2013. <http://www.cancer.org/acs/groups/content/@epidemiologysurveillance/documents/document/acspc-036845.pdf> (Accessed October 2013). 60 p.
2. Ferlay J, Shin HR, Bray F, Forman D, Mathers C, Parkin DM. Estimates of worldwide burden of cancer in 2008: Globocan 2008. *Int J Cancer* 2010;127:2893–917.
3. Tropé CG, Abeler VM, Kristensen GB. Diagnosis and treatment of sarcoma of the uterus. A review. *Acta Oncol* 2012;51:694–705.
4. Silverberg SG, Kurman RJ, Nogales F, Mutter GL, Kubik-Nuch RA, Tavassoli FA. Tumors of the uterine corpus. In: Tavassoli FA, Devilee P, eds. *World Health Organization classification of tumours: pathology and genetics of tumors of the breast and female genital organs*. Lyon: IARC Press; 2003. p 221–32.
5. Salvesen HB, Haldorsen IS, Trovik J. Markers for individualised therapy in endometrial carcinoma. *Lancet Oncol* 2012;13:e353–61.
6. Long B, Liu FW, Bristow RE. Disparities in uterine cancer epidemiology, treatment, and survival among African Americans in the United States. *Gynecol Oncol* 2013;130:652–9.
7. Long J, Zheng W, Xiang YB, Lose F, Thompson D, Tomlinson I, et al. Genome-wide association study identifies a possible susceptibility locus for endometrial cancer. *Cancer Epidemiol Biomarkers Prev* 2012;21:980–7.
8. Tan MH, Mester JL, Ngeow J, Rybicki LA, Orloff MS, Eng C. Lifetime cancer risks in individuals with germline PTEN mutations. *Clin Cancer Res* 2012;18:400–7.
9. Lynch HT, Shaw MW, Magnuson CW, Larsen AL, Krush AJ. Hereditary factors in cancer. Study of two large Midwestern kindreds. *Arch Intern Med* 1966;117:206–12.
10. Vasen HF, Offerhaus GJ, den Hartog Jager FC, Menko FH, Nagengast FM, Griffioen G, et al. The tumour spectrum in hereditary non-polyposis colorectal cancer: a study of 24 kindreds in the Netherlands. *Int J Cancer* 1990;46:31–4.
11. Huang M, Djordjevic B, Yates MS, Urbauer D, Sun C, Burzawa J, et al. Molecular pathogenesis of endometrial cancers in patients with Lynch syndrome. *Cancer* 2013;119:3027–33.
12. Palles C, Cazier JB, Howarth KM, Domingo E, Jones AM, Broderick P, et al. Germline mutations affecting the proofreading domains of POLE and POLD1 predispose to colorectal adenomas and carcinomas. *Nat Genet* 2013;45:136–44.
13. Lavie O, Ben-Arie A, Segev Y, Faro J, Barak F, Haya N, et al. BRCA germline mutations in women with uterine serous carcinoma—still a debate. *Int J Gynecol Cancer* 2010;20:1531–4.
14. Segev Y, Iqbal J, Lubinski J, Gronwald J, Lynch HT, Moller P, et al. The incidence of endometrial cancer in women with BRCA1 and BRCA2 mutations: an international prospective cohort study. *Gynecol Oncol* 2013;130:127–31.
15. The Cancer Genome Atlas Research Network, Kandoth C, Schultz N, Cherniack AD, Akbani R, Liu Y, et al. Integrated genomic characterization of endometrial carcinoma. *Nature* 2013;497:67–73.
16. Kuhn E, Wu RC, Guan B, Wu G, Zhang J, Wang Y, et al. Identification of molecular pathway aberrations in uterine serous carcinoma by genome-wide analyses. *J Natl Cancer Inst* 2012;104:1503–13.
17. Zhao S, Choi M, Overton JD, Bellone S, Roque DM, Cocco E, et al. Landscape of somatic single-nucleotide and copy-number mutations in uterine serous carcinoma. *Proc Natl Acad Sci U S A* 2013;110:2916–22.
18. Le Gallo M, O'Hara AJ, Rudd ML, Urlick ME, Hansen NF, O'Neil NJ, et al. Exome sequencing of serous endometrial tumors identifies recurrent somatic mutations in chromatin-remodeling and ubiquitin ligase complex genes. *Nat Genet* 2012;44:1310–5.
19. Kinde I, Bettgeowda C, Wang Y, Wu J, Agrawal N, Shih IM, et al. Evaluation of DNA from the Papanicolaou test to detect ovarian and endometrial cancers. *Sci Transl Med* 2013;5:167ra4.
20. Liang H, Cheung LW, Li J, Ju Z, Yu S, Stemke-Hale K, et al. Whole-exome sequencing combined with functional genomics reveals novel candidate driver cancer genes in endometrial cancer. *Genome Res* 2012;22:2120–9.
21. Dedes KJ, Wetterskog D, Ashworth A, Kaye SB, Reis-Filho JS. Emerging therapeutic targets in endometrial cancer. *Nat Rev Clin Oncol* 2011;8:261–71.
22. Mahboubi E, Eyler N, Wynder EL. Epidemiology of cancer of the endometrium. *Clin Obstet Gynecol* 1982;25:5–17.
23. Setiawan VW, Yang HP, Pike MC, McCann SE, Yu

- H, Xiang YB, et al. Type I and II endometrial cancers: Have they different risk factors? *J Clin Oncol* 2013;31:2607–18.
24. O'Hara AJ, Bell DW. The genomics and genetics of endometrial cancer. *Adv Genomics Genet* 2012;2012:33–47.
  25. Lewin SN, Herzog TJ, Barrena Medel NI, Deutsch I, Burke WM, Sun X, Wright JD. Comparative performance of the 2009 International Federation of Gynecology and Obstetrics' staging system for uterine corpus cancer. *Obstet Gynecol* 2010;116:1141–9.
  26. Bradford LS, Rau-Hain JA, Schorge J, Birrer MJ, Dizon DS. Advances in the management of recurrent endometrial cancer. *Am J Clin Oncol* [Epub ahead of print 2013 Jun 11].
  27. Pere H, Tapper J, Wahlstrom T, Knuutila S, Butzow R. Distinct chromosomal imbalances in uterine serous and endometrioid carcinomas. *Cancer Res* 1998;58:892–5.
  28. Risinger JJ, Hayes AK, Berchuck A, Barrett JC. PTEN/MMAC1 mutations in endometrial cancers. *Cancer Res* 1997;57:4736–8.
  29. Rudd ML, Price JC, Fogoros S, Godwin AK, Sgroi DC, Merino MJ, Bell DW. A unique spectrum of somatic PIK3CA (p110 $\alpha$ ) mutations within primary endometrial carcinomas. *Clin Cancer Res* 2011;17:1331–40.
  30. Urlick ME, Rudd ML, Godwin AK, Sgroi D, Merino M, Bell DW. PIK3R1 (p85 $\alpha$ ) is somatically mutated at high frequency in primary endometrial cancer. *Cancer Res* 2011;71:4061–7.
  31. Cheung LW, Hennessy BT, Li J, Yu S, Myers AP, Djordjevic B, et al. High frequency of PIK3R1 and PIK3R2 mutations in endometrial cancer elucidates a novel mechanism for regulation of PTEN protein stability. *Cancer Discov* 2011;1:170–85.
  32. Oda K, Stokoe J, Taketani Y, McCormick F. High frequency of coexistent mutations of PIK3CA and PTEN genes in endometrial carcinoma. *Cancer Res* 2005;65:10669–73.
  33. Werner HM, Berg A, Wik E, Birkeland E, Krakstad C, Kusonmano K, et al. ARID1A loss is prevalent in endometrial hyperplasia with atypia and low-grade endometrioid carcinomas. *Mod Pathol* 2013;26:428–34.
  34. Bosse T, Ter Haar NT, Seeber LM, Diest PJ, Hes FJ, Vasen HF, et al. Loss of ARID1A expression and its relationship with PI3K-AKT pathway alterations, TP53 and microsatellite instability in endometrial cancer. *Mod Pathol* 2013;26:1525–35.
  35. Rahman M, Nakayama K, Rahman MT, Katagiri H, Katagiri A, Ishibashi T, et al. Clinicopathologic analysis of loss of AT-rich interactive domain 1a expression in endometrial cancer. *Human Pathol* 2013;44:103–9.
  36. Byron SA, Gartside M, Powell MA, Wellens CL, Gao F, Mutch DG, et al. FGFR2 point mutations in 466 endometrioid endometrial tumors: relationship with MSI, KRAS, PIK3CA, CTNNB1 mutations and clinicopathological features. *PLoS One* 2012;7:e30801.
  37. Pollock PM, Gartside MG, Dejeza LC, Powell MA, Mallon MA, Davies H, et al. Frequent activating FGFR2 mutations in endometrial carcinomas parallel germline mutations associated with craniosynostosis and skeletal dysplasia syndromes. *Oncogene* 2007;26:7158–62.
  38. Machin P, Catusus L, Pons C, Munoz J, Matias-Guiu X, Prat J. CTNNB1 mutations and  $\beta$ -catenin expression in endometrial carcinomas. *Hum Pathol* 2002;33:206–12.
  39. Schlosshauer PW, Ellenson LH, Soslow RA.  $\beta$ -Catenin and E-cadherin expression patterns in high-grade endometrial carcinoma are associated with histological subtype. *Mod Pathol* 2002;15:1032–7.
  40. Goodfellow PJ, Buttin BM, Herzog TJ, Rader JS, Gibb RK, Swisher E, et al. Prevalence of defective DNA mismatch repair and MSH6 mutation in an unselected series of endometrial cancers. *Proc Natl Acad Sci U S A* 2003;100:5908–13.
  41. Esteller M, Catusus L, Matias-Guiu X, Mutter GL, Prat J, Baylin SB, Herman JG. hMLH1 promoter hypermethylation is an early event in human endometrial tumorigenesis. *Am J Pathol* 1999;155:1767–72.
  42. Simpkins SB, Bocker T, Swisher EM, Mutch DG, Gersell DJ, Kovatich AJ, et al. MLH1 promoter methylation and gene silencing is the primary cause of microsatellite instability in sporadic endometrial cancers. *Hum Mol Genet* 1999;8:661–6.
  43. Ries LAG, Young JL, Keel GE, Eisner MP, Lin YD, Horner M-J. SEER survival monograph: cancer survival among adults: U.S. SEER Program, 1988–2001. Patient and tumor characteristics. Bethesda (MD): National Cancer Institute, SEER Program; 2007. NIH Pub. No. 07-6215.
  44. Hamilton CA, Cheung MK, Osann K, Chen L, Teng NN, Longacre TA, et al. Uterine papillary serous and clear cell carcinomas predict for poorer survival compared to grade 3 endometrioid corpus cancers. *Br J Cancer* 2006;94:642–6.
  45. Fadare O, Zheng W. Endometrial serous carcinoma (uterine papillary serous carcinoma): pre-cancerous lesions and the theoretical promise of a preventive approach. *Am J Cancer Res* 2012;2:335–9.
  46. Moore KN, Fader AN. Uterine papillary serous carcinoma. *Clin Obstet Gynecol* 2011;54:278–91.
  47. del Carmen MG, Birrer M, Schorge JO. Uterine papillary serous cancer: a review of the literature. *Gynecol Oncol* 2012;127:651–61.
  48. Sherman ME, Bur ME, Kurman RJ. p53 in endometrial cancer and its putative precursors: evidence for diverse pathways of tumorigenesis. *Hum Pathol* 1995;26:1268–74.
  49. Tashiro H, Isaacson C, Levine R, Kurman RJ, Cho KR, Hedrick L. p53 gene mutations are common in uterine serous carcinoma and occur early in their pathogenesis. *Am J Pathol* 1997;150:177–85.
  50. Wild PJ, Ikenberg K, Fuchs TJ, Rechsteiner M, Georgiev S, Fankhauser N, et al. p53 suppresses type II endometrial carcinomas in mice and governs endometrial tumour aggressiveness in humans. *EMBO Mol Med* 2012;4:808–24.
  51. Clarke BA, Gilks CB. Endometrial carcinoma: controversies in histopathological assessment of grade and tumour cell type. *J Clin Pathol* 2010;63:410–5.
  52. Gilks CB, Oliva E, Soslow RA. Poor interobserver reproducibility in the diagnosis of high-grade endometrial carcinoma. *Am J Surg Pathol* 2013;37:874–81.
  53. Soslow RA. High-grade endometrial carcinomas – strategies for typing. *Histopathology* 2013;62:89–110.
  54. Darvishian F, Hummer AJ, Thaler HT, Bhargava R, Linkov I, Asher M, Soslow RA. Serous endometrial cancers that mimic endometrioid adenocarcinomas: a clinicopathologic and immunohistochemical study of a group of problematic cases. *Am J Surg Pathol* 2004;28:1568–78.
  55. Yemelyanova A, Ji H, Shih IeM, Wang TL, Wu LS, Ronnett BM. Utility of p16 expression for distinction of uterine serous carcinomas from endometrioid endometrioid and endocervical adenocarcinomas: immunohistochemical analysis of 201 cases. *Am J Surg Pathol* 2009;33:1504–14.
  56. Alkushi A, Kobel M, Kalloger SE, Gilks CB. High-grade endometrial carcinoma: Serous and grade 3 endometrioid carcinomas have different immunophenotypes and outcomes. *Int J Gynecol Pathol* 2010;29:343–50.
  57. Alvarez T, Miller E, Duska L, Oliva E. Molecular profile of grade 3 endometrioid endometrial carcinoma: Is it a type I or type II endometrial carcinoma? *Am J Surg Pathol* 2012;36:753–61.
  58. McConechy MK, Ding J, Cheang MC, Wiegand K, Senz J, Tane A, et al. Use of mutation profiles to refine the classification of endometrial carcinomas. *J Pathol* 2012;228:20–30.
  59. Pursell ZF, Kunkel TA. DNA polymerase  $\epsilon$ : a polymerase of unusual size (and complexity). *Prog Nucleic Acid Res Mol Biol* 2008;82:101–45.
  60. Church DN, Briggs SE, Palles C, Domingo E, Kearsey SJ, Grimes JM, et al. DNA polymerase  $\epsilon$  and  $\delta$  exonuclease domain mutations in endometrial cancer. *Hum Mol Genet* 2013;22:2820–8.
  61. Zigelboim I, Goodfellow PJ, Gao F, Gibb RK, Powell MA, Rader JS, Mutch DG. Microsatellite instability and epigenetic inactivation of MLH1 and outcome of patients with endometrial carcinomas of the endometrioid type. *J Clin Oncol* 2007;25:2042–8.
  62. An HJ, Kim KI, Kim JY, Shim JY, Kang H, Kim TH, et al. Microsatellite instability in endometrioid type endometrial adenocarcinoma is associated with poor prognostic indicators. *Am J Surg Pathol* 2007;31:846–53.
  63. Konopka B, Janiec-Jankowska A, Czapczak D, Paszko Z, Bidzinski M, Olszewski W, Goluda C. Molecular genetic defects in endometrial carcinomas: microsatellite instability, PTEN and beta-catenin (CTNNB1) genes mutations. *J Cancer Res Clin Oncol* 2007;133:361–71.
  64. Black D, Soslow RA, Levine DA, Tornos C, Chen SC, Hummer AJ, et al. Clinicopathologic significance of defective DNA mismatch repair in endometrial carcinoma. *J Clin Oncol* 2006;24:1745–53.
  65. Moreno-Bueno G, Rodriguez-Perales S, Sánchez-Estévez C, Marcos R, Hardisson D, Cigudosa JC, Palacios J. Molecular alterations associated with cyclin D1 overexpression in endometrial cancer. *Int J Cancer* 2004;110:194–200.
  66. Novetsky AP, Zigelboim I, Thompson DM Jr, Powell MA, Mutch DG, Goodfellow PJ. Frequent mutations in the RPL22 gene and its clinical and functional implications. *Gynecol Oncol* 2013;128:470–4.
  67. Rao S, Lee SY, Gutierrez A, Perrigoue J, Thapa RJ, Tu Z, et al. Inactivation of ribosomal protein L22 promotes transformation by induction of the stemness factor, lin28b. *Blood* 2012;120:3764–73.
  68. Slomovitz BM, Coleman RL. The PI3K/AKT/mTOR pathway as a therapeutic target in endometrial cancer. *Clin Cancer Res* 2012;18:5856–64.



69. Diaz-Padilla I, Romero N, Amir E, Matias-Guiu X, Vilar E, Muggia F, Garcia-Donas J. Mismatch repair status and clinical outcome in endometrial cancer: a systematic review and meta-analysis. *Crit Rev Oncol Hematol* 2013;88:154–67.
70. Lawrence MS, Stojanov P, Polak P, Kryukov GV, Cibulskis K, Sivachenko A, et al. Mutational heterogeneity in cancer and the search for new cancer-associated genes. *Nature* 2013;499:214–8.
71. Newbury R, Schuerch C, Goodspeed N, Fanning J, Glidewell O, Evans M. DNA content as a prognostic factor in endometrial carcinoma. *Obstet Gynecol* 1990;76:251–7.
72. Prat J, Oliva E, Lerma E, Vaquero M, Matias-Guiu X. Uterine papillary serous adenocarcinoma. A 10-case study of p53 and c-erbB-2 expression and DNA content. *Cancer* 1994;74:1778–83.
73. Berns K, Horlings HM, Hennessy BT, Madiredjo M, Hijmans EM, Beelen K, et al. A functional genetic approach identifies the PI3K pathway as a major determinant of trastuzumab resistance in breast cancer. *Cancer Cell* 2007;12:395–402.
74. Eichhorn PJ, Gili M, Scaltriti M, Serra V, Guzman M, Nijkamp W, et al. Phosphatidylinositol 3-kinase hyperactivation results in lapatinib resistance that is reversed by the mTOR/phosphatidylinositol 3-kinase inhibitor NVP-BEZ235. *Cancer Res* 2008;68:9221–30.
75. El-Sahwi KS, Schwartz PE, Santin AD. Development of targeted therapy in uterine serous carcinoma, a biologically aggressive variant of endometrial cancer. *Expert Rev Anticancer Ther* 2012;12:41–9.
